# Supplementary material for: All-solid-state Z-scheme Ag3PO4/CSs/AgBr heterostructures for efficient visible-light photocatalysis and the photocatalytic mechanism
Source: Royal Society of Chemistry journal article supplement (doi:10.1039/d1dt02937a), 2021-01-01
Supplement: d1dt02937a1.pdf [file d1dt02937a1.pdf]

## Supplementary Information

### **All-solid-state Z-scheme $\text{Ag}_3\text{PO}_4/\text{CSs}/\text{AgBr}$ heterostructures for efficient visible-light photocatalysis and photocatalytic**

Nan Li<sup>a,b</sup>, Guodong Fan<sup>\* a,b</sup>, Miaomiao Fan<sup>c</sup>, Fan Wu<sup>a,b</sup>, Guoxian Zhang<sup>a,b</sup>, Di Fan<sup>d,e</sup>

<sup>a</sup> Shaanxi Key Laboratory of Chemical Additives for Industry, Shaanxi University of Science & Technology, Xi'an 710021, China

<sup>b</sup> College of Chemistry and Chemical Engineering, Shaanxi University of Science & Technology, Xi'an 710021, Shaanxi, China

<sup>c</sup> Shaanxi Shen-Wei Coal Pipeline Transportation Limited Liability Company, Xi 'an 710065 , China

<sup>d</sup> Department of Information Engineering, Shaanxi Polytechnic Institute, Xianyang 712000, Shaanxi, China

<sup>e</sup> Department of Electronic and Electrical Engineering, University of Sheffield, Sheffield S10 2TN, UK

\*Corresponding author (E-mail: [fangd@sust.edu.cn](mailto:fangd@sust.edu.cn))

To further confirm the existence of Ag in the used  $\text{Ag}_3\text{PO}_4/\text{CSs}/\text{AgBr-4}$  hybrid sample, the used  $\text{Ag}_3\text{PO}_4/\text{CSs}/\text{AgBr-4}$  sample after 5 recycling runs was examined by XPS analysis. The results are shown in Fig. S. Fig. Sa shows the XPS survey spectrum of the used photocatalyst, which mainly exhibited the peaks of Ag, Br, P, O and C. No other impurities were presented in the sample. A high-resolution XPS spectrum of Ag 3d is shown in Fig. Sb and Fig. Sc.

As shown in Fig. Sb, a pair of symmetric peaks that located at 367.7 and 373.7 eV are ascribed to the binding energy values of the  $3d_{5/2}$  and  $3d_{3/2}$  of  $\text{Ag}^+$  in the fresh  $\text{Ag}_3\text{PO}_4/\text{CSs}/\text{AgBr-4}$ .

As shown in Fig. Sc, the used  $\text{Ag}_3\text{PO}_4/\text{CSs}/\text{AgBr-4}$  sample could be separated the  $\text{Ag}^0$  and  $\text{Ag}^+$  peaks. The weak peaks at 368.8 and 374.8 eV are attributed to  $\text{Ag}^0$ , while the strong peaks at 367.7 and 373.7 eV are assigned to  $\text{Ag}^+$  of AgBr and  $\text{Ag}_3\text{PO}_4$ . From the XPS peak areas, the molar ratio of  $\text{Ag}^0$  to  $\text{Ag}^+$  is  $n(\text{Ag}^0): n(\text{Ag}^+) = 31.1:68.9$ , and the surface  $\text{Ag}^0$  and  $\text{Ag}^+$  contents are calculated to be 5.8 and 12.9 mol %, respectively.

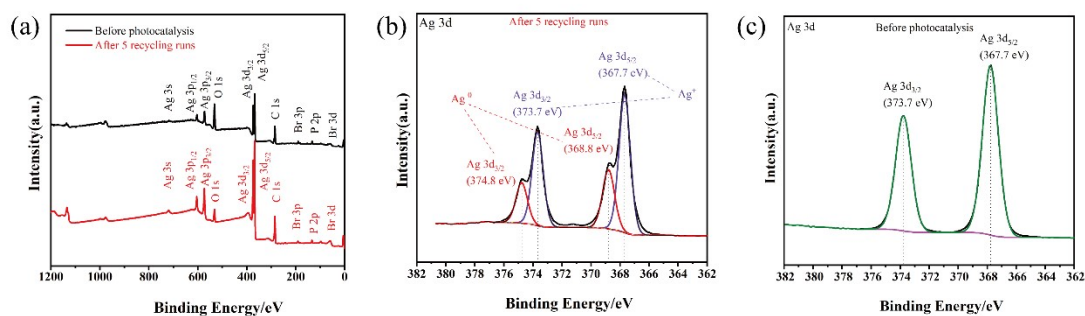

**Fig S.** XPS survey spectrum of  $\text{Ag}_3\text{PO}_4/\text{CSs}/\text{AgBr-4}$  (a), Ag 3d XPS spectra of the fresh (b) and the used (c)  $\text{Ag}_3\text{PO}_4/\text{CSs}/\text{AgBr-4}$  after 5 recycling runs.

[Table S1](#) lists the results of UPS analysis. Compared with Au and Ag, the ionization potential of CSs is smaller and it shows metallicity, so it can be used as a metal-like material to construct an ideal Z-scheme heterojunction. The atomic contents of all the elements in Ag<sub>3</sub>PO<sub>4</sub>/CSs/AgBr-4 sample are listed in [Table S2](#).

**Table S1** The UPS calculation results of each sample

| Photocatalyst                               | $\Phi/eV$ | $E_{\text{HOMO}}-E_f/eV$ | $E_g/eV$ | $IP/eV$ | $E_a/eV$ |
|---------------------------------------------|-----------|--------------------------|----------|---------|----------|
| CSs                                         | 4.37      | -2.93                    | 7.30     | ----    | ----     |
| Ag <sub>3</sub> PO <sub>4</sub>             | 4.57      | -2.64                    | 7.21     | 2.24    | 4.97     |
| Ag <sub>3</sub> PO <sub>4</sub> /CSs        | 4.49      | -2.74                    | 7.23     | 2.13    | 5.10     |
| Ag <sub>3</sub> PO <sub>4</sub> /CSs/AgBr-4 | 4.560     | -2.73                    | 7.32     | 1.96    | 5.36     |

**Table S2.** XPS results of the fresh and the used Ag<sub>3</sub>PO<sub>4</sub>/CSs/AgBr-4

|                                                                             | Mole fraction/% |     |     |      |      |
|-----------------------------------------------------------------------------|-----------------|-----|-----|------|------|
|                                                                             | Ag              | Br  | P   | O    | C    |
| The fresh Ag <sub>3</sub> PO <sub>4</sub> /CSs/AgBr-4                       | 10.4            | 0.2 | 6.7 | 29.6 | 53.1 |
| The used AgBr/Ag <sub>3</sub> PO <sub>4</sub> /CSs-4 after 5 recycling runs | 18.8            | 0.1 | 5.9 | 13.1 | 62.1 |
